# Supplementary material
Source: publisher figshare collection journal article supplement (https://acs.figshare.com/ndownloader/files/4290403)
Supplement: Supplementary file 1 [file 4290403]

# SUPPORTING INFORMATION

## An electroneutral macrocyclic iron(II) complex that enhances MRI contrast in vivo

*Fayçal Touti, Akhilesh Kumar Singh, Philippe Maurin, Laurence Canaple, Olivier Beuf, Jacques Samarut, and Jens Hasserodt*

### Table of Contents :

|           |                                                                                                    |
|-----------|----------------------------------------------------------------------------------------------------|
| S2 :      | <sup>1</sup> H NMR spectrum of <b>8</b>                                                            |
| S3 :      | <sup>13</sup> C NMR spectrum of <b>8</b>                                                           |
| S4 :      | <sup>1</sup> H NMR spectrum of <b>1,4-bis-(1-benzyltetrazol-5-yl)methyl-1,4,7-triazacyclonane</b>  |
| S5 :      | <sup>13</sup> C NMR spectrum of <b>1,4-bis-(1-benzyltetrazol-5-yl)methyl-1,4,7-triazacyclonane</b> |
| S6 :      | <sup>1</sup> H NMR spectrum of <b>9</b>                                                            |
| S7 :      | <sup>13</sup> C NMR spectrum of <b>9</b>                                                           |
| S8-S10 :  | HPLC – mass analysis of <b>9</b>                                                                   |
| S11-S12 : | HPLC – mass analysis of complex <b>1</b>                                                           |
| S13 :     | infrared spectrum of complex <b>1</b>                                                              |
| S14 :     | protocols for injection/electroporation and MR imaging                                             |

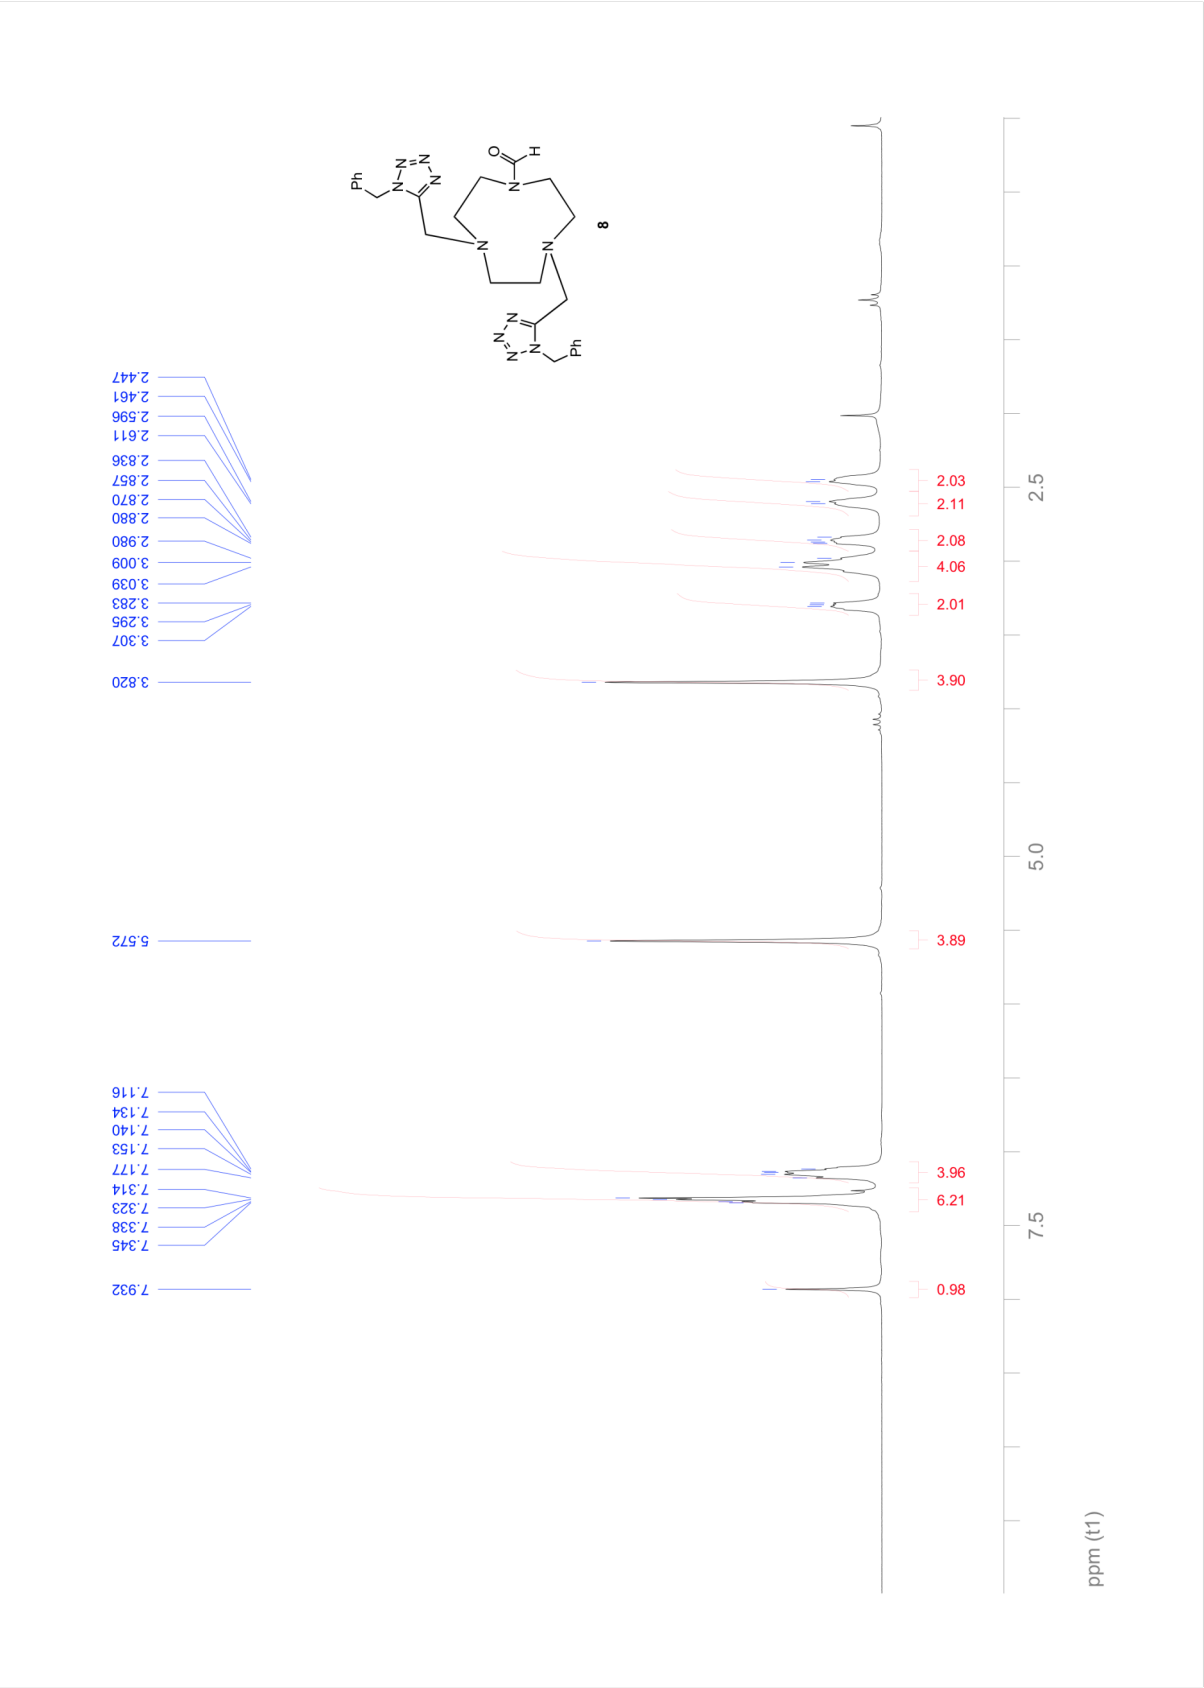

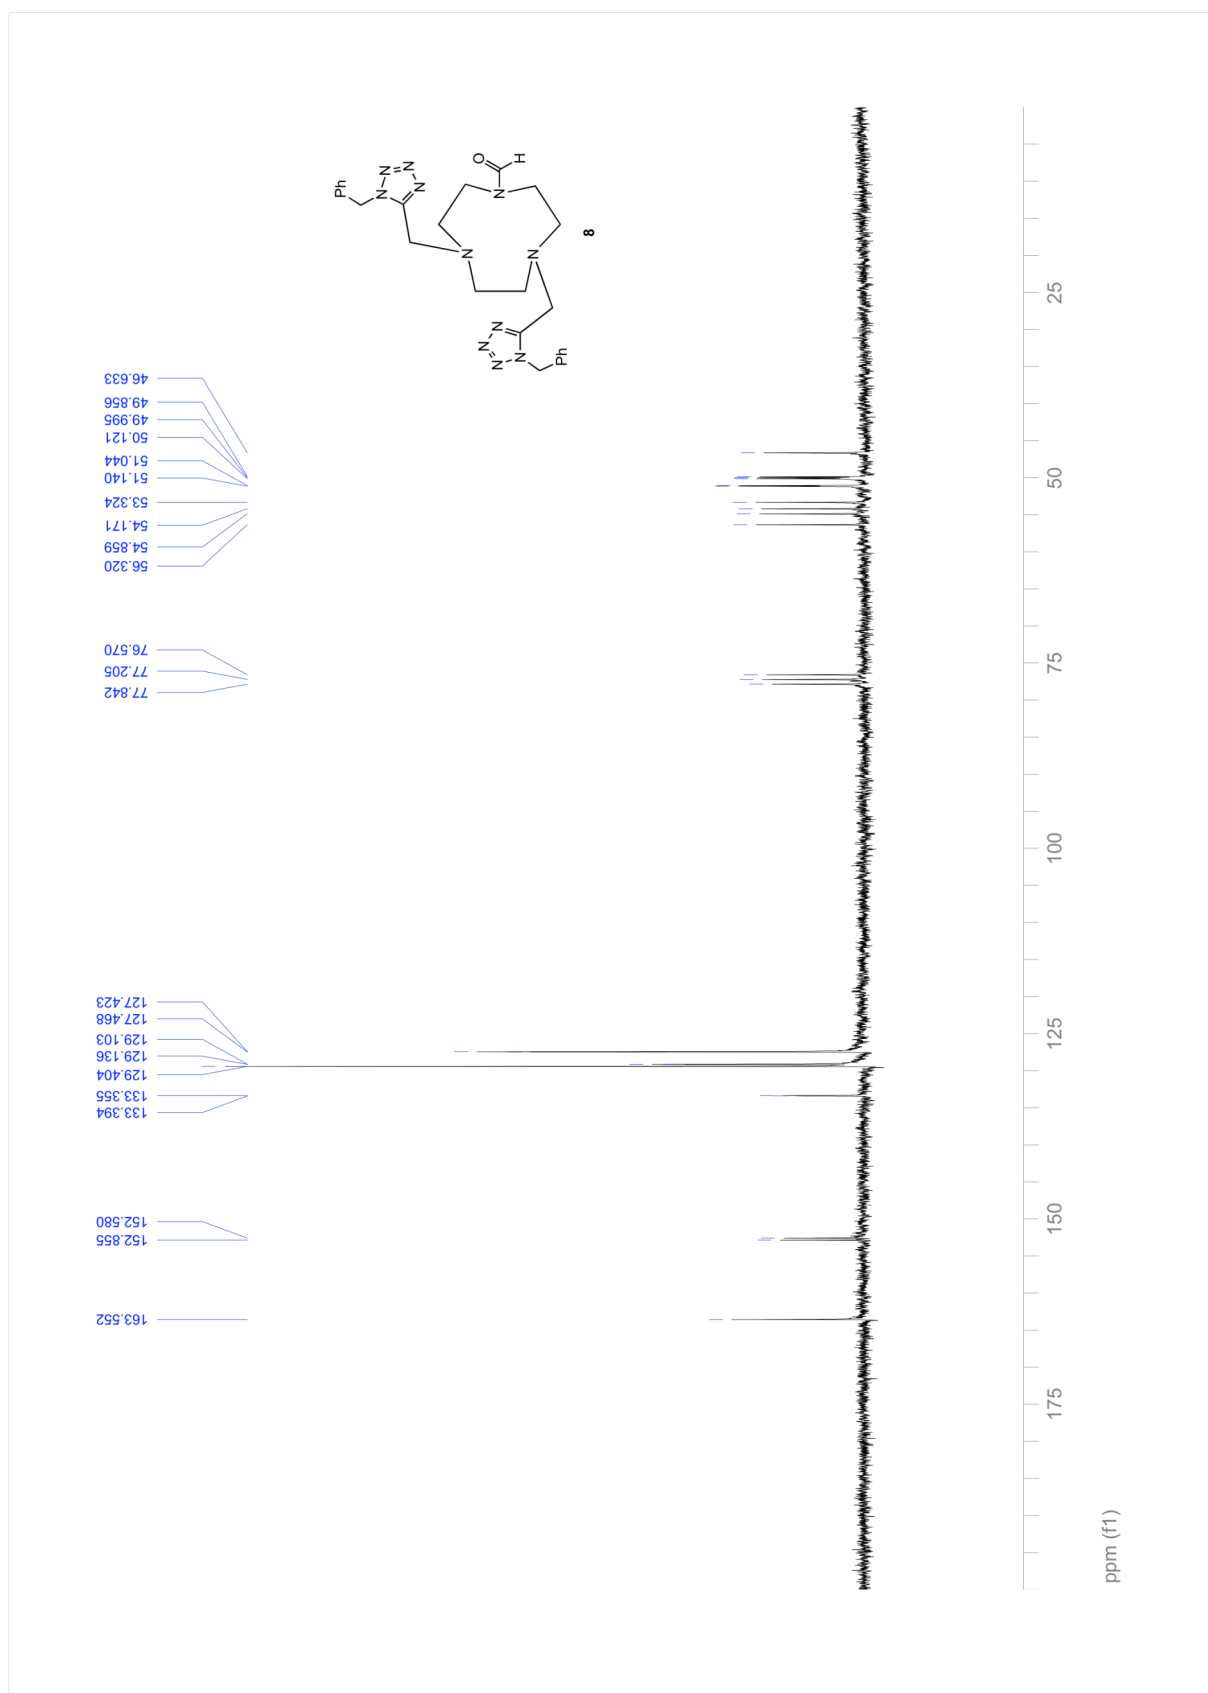



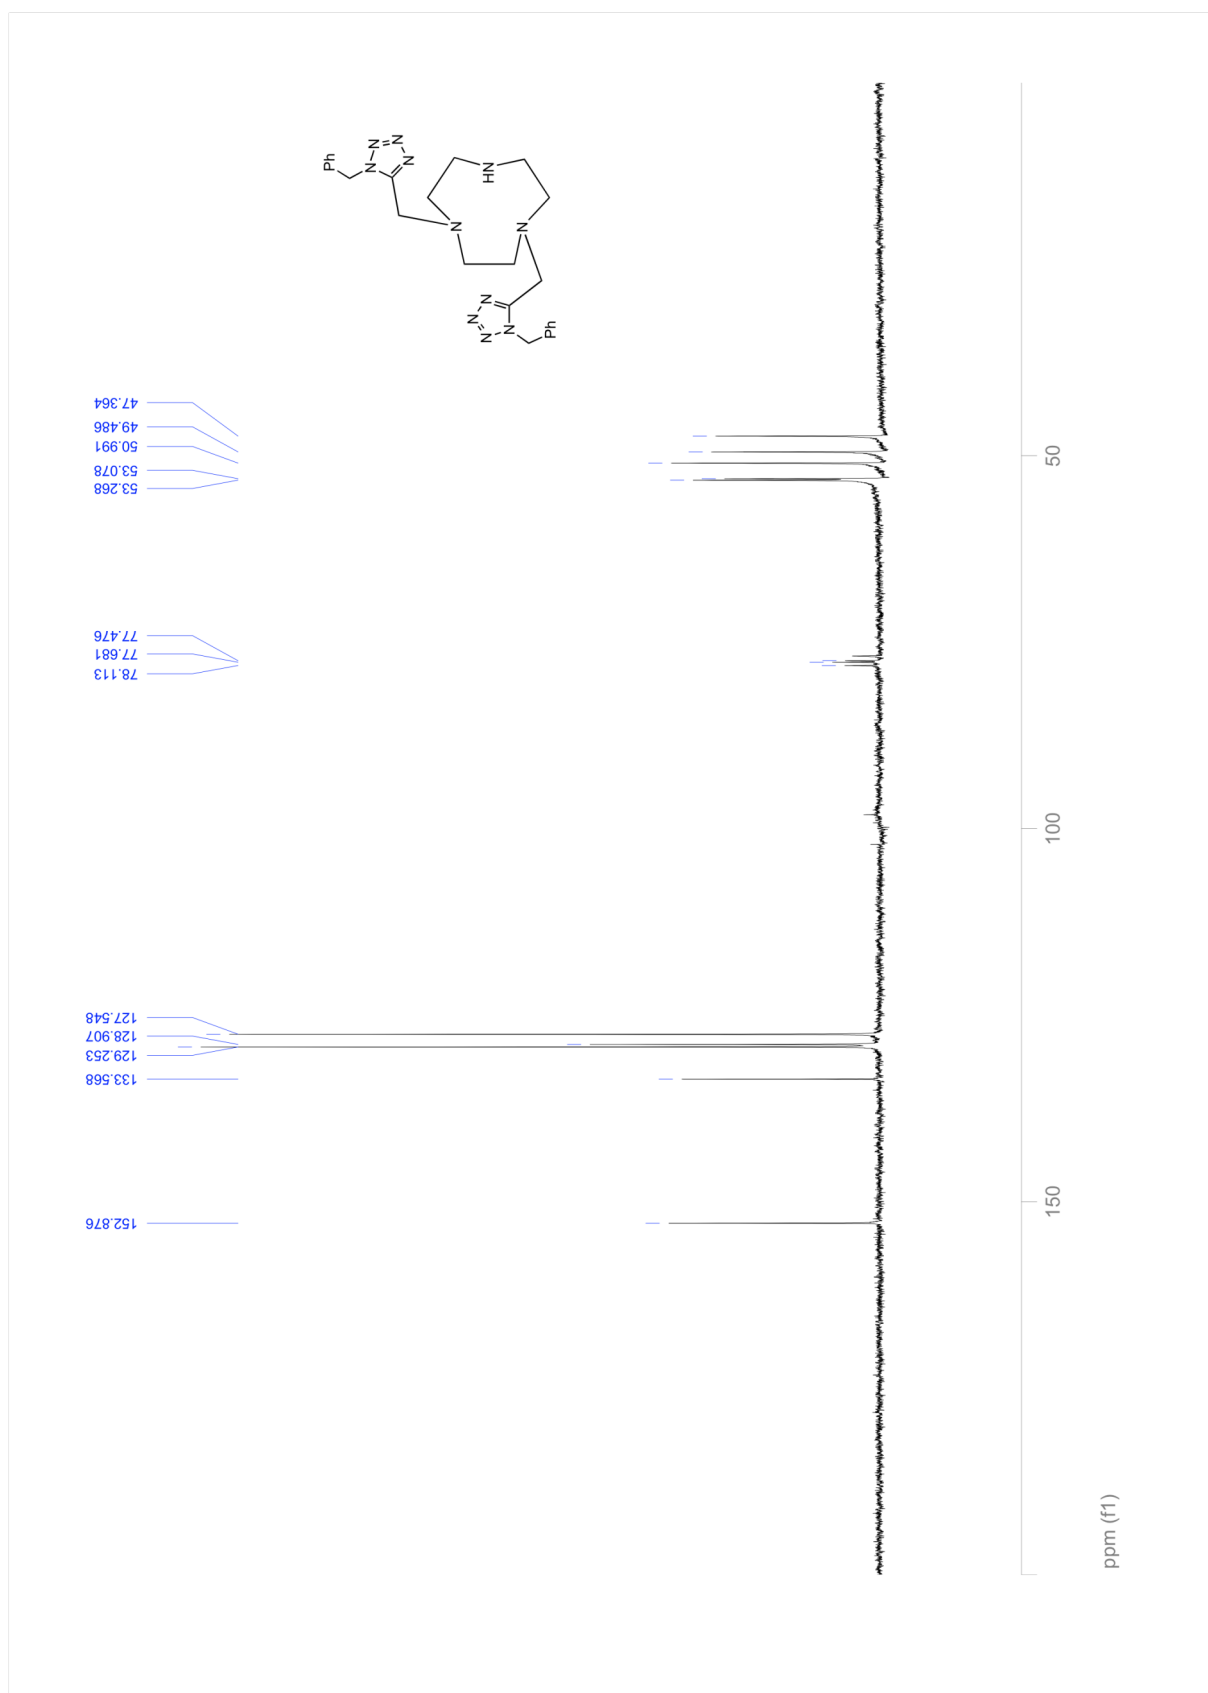

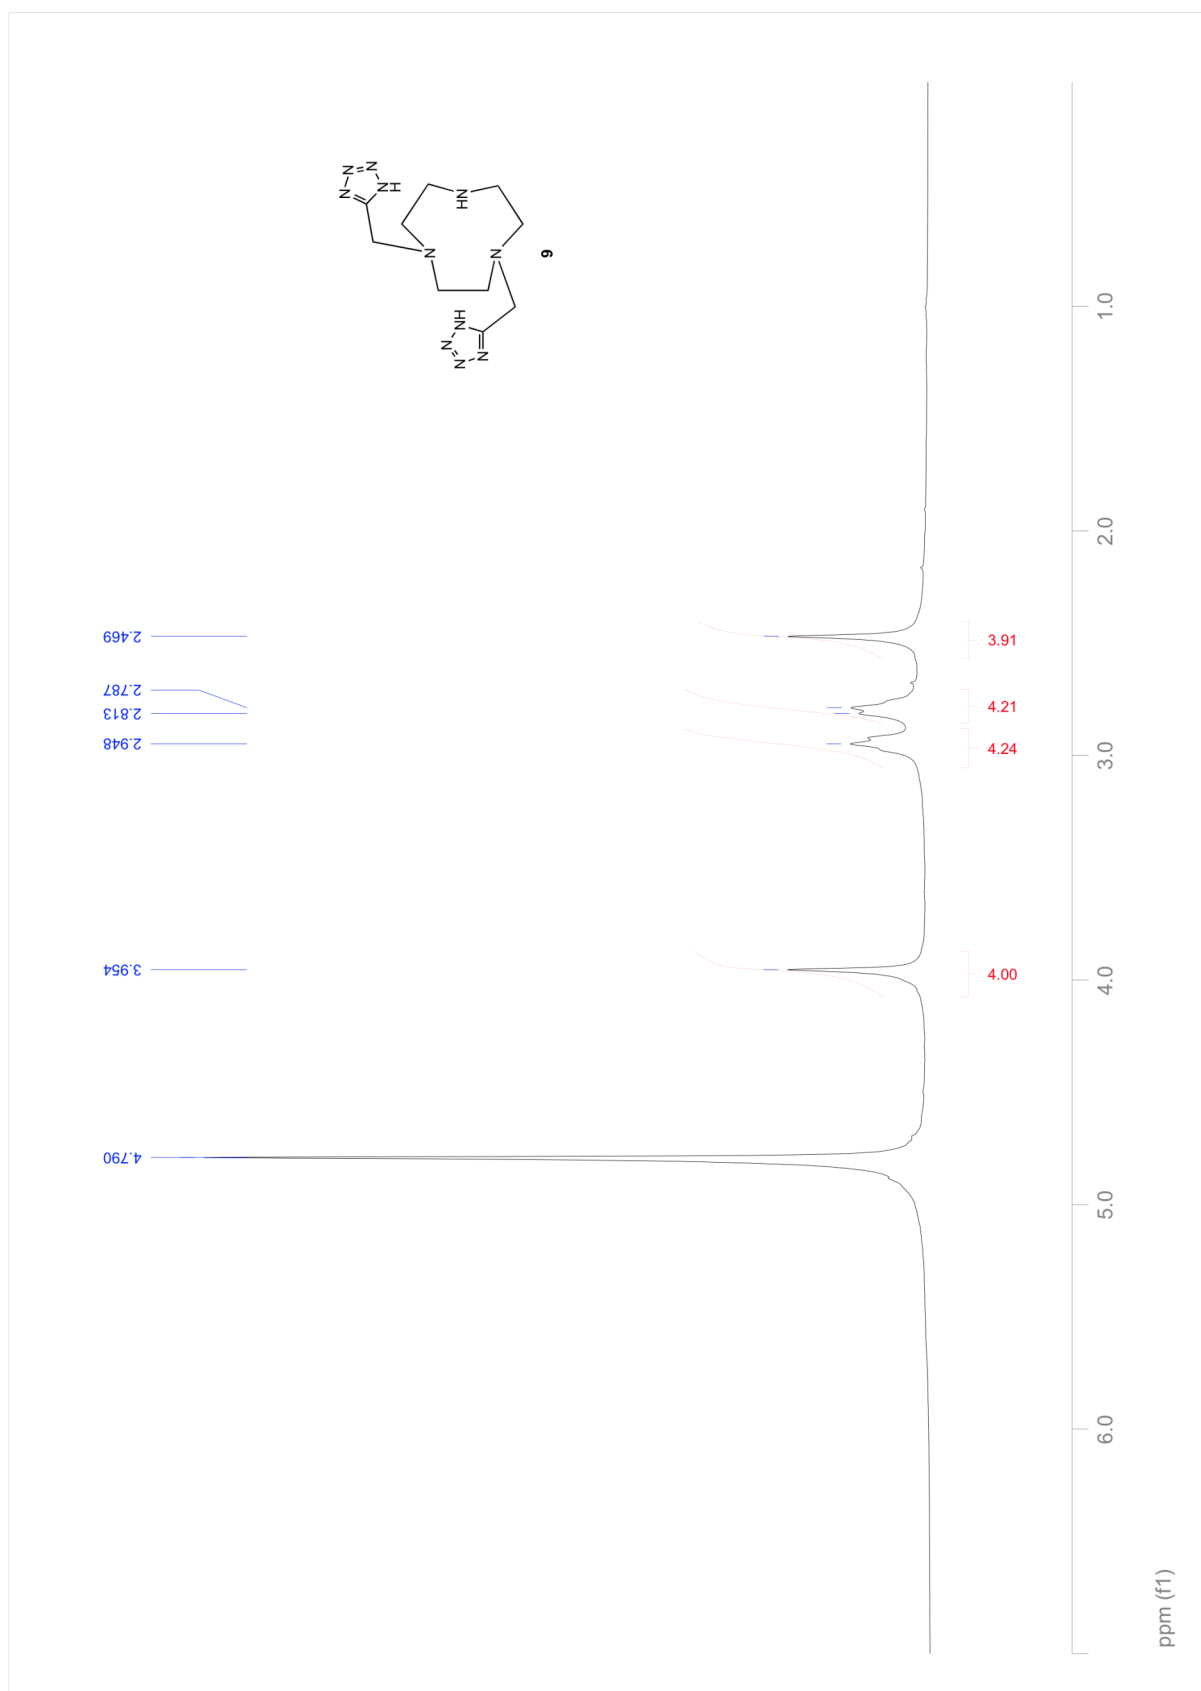

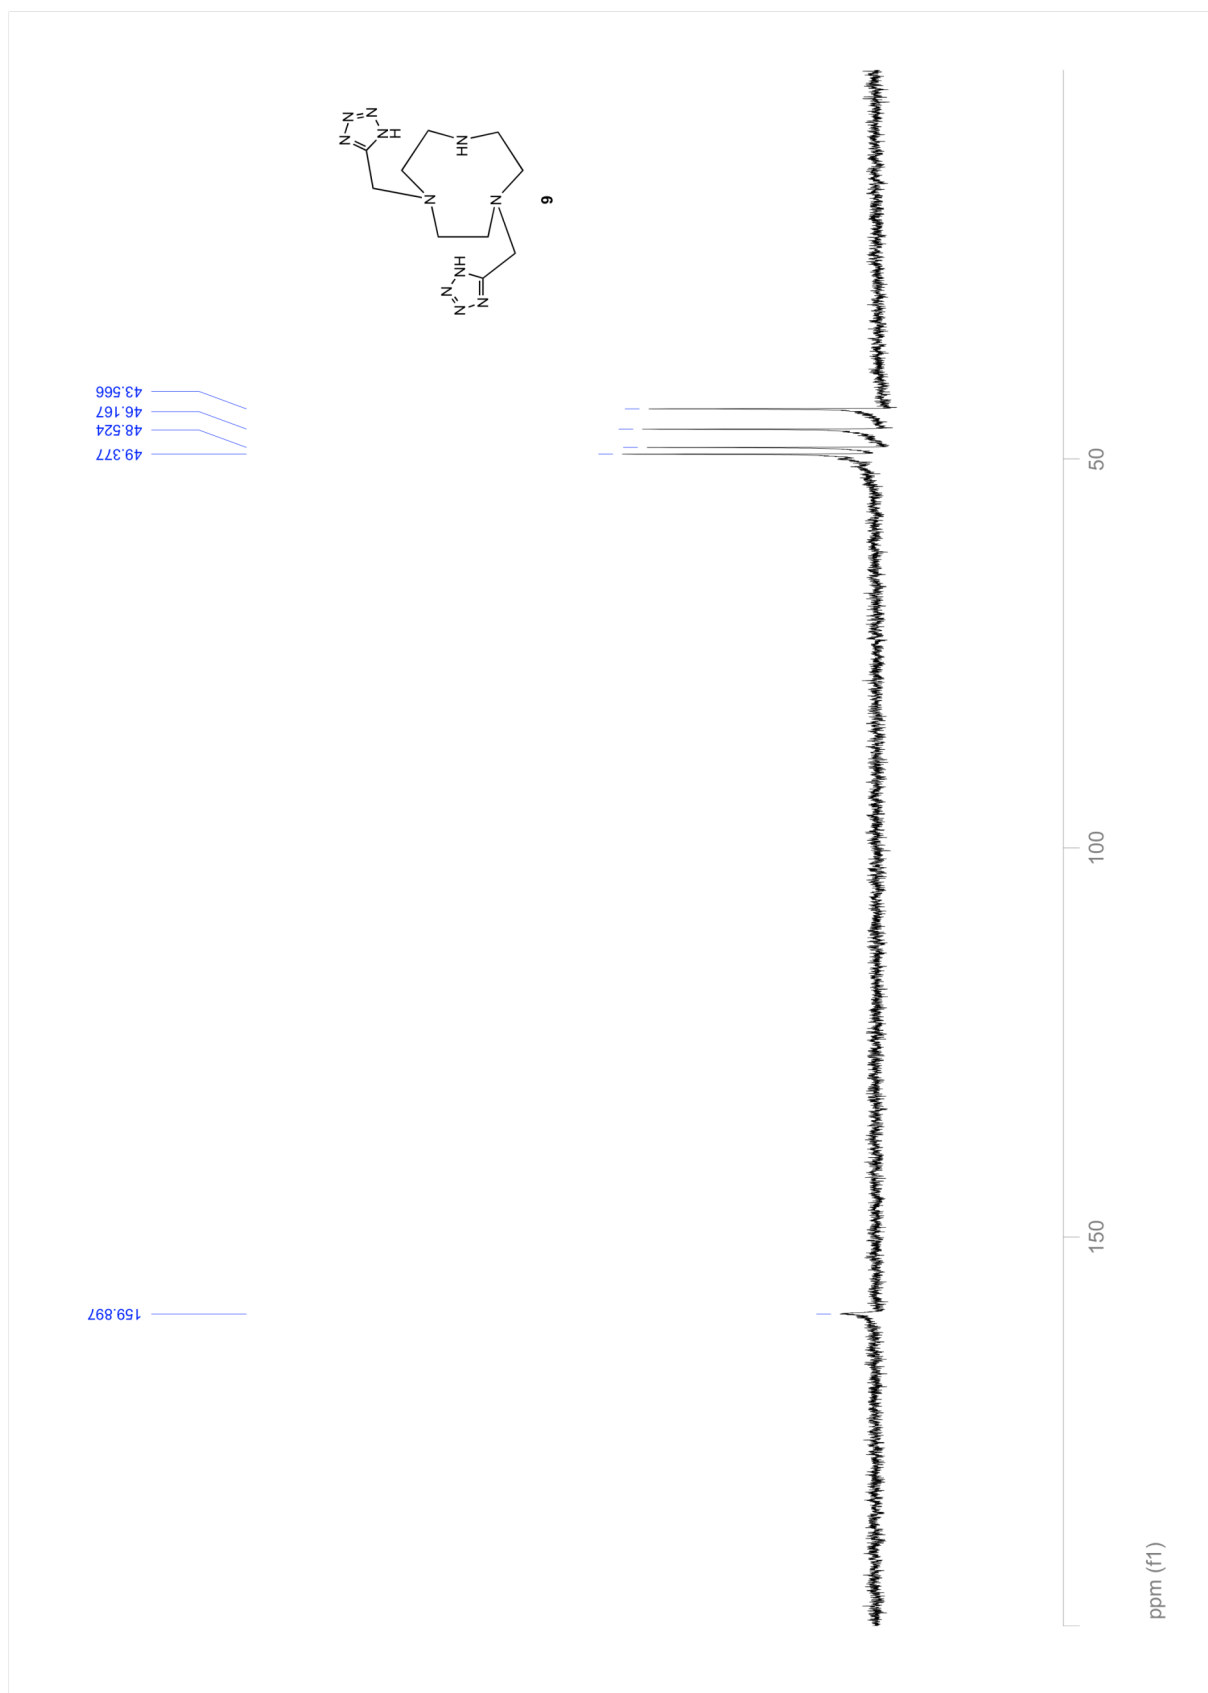

LCMS analyses of ligand **9** : (a) DAD detection; (b) mass detection by scan in positive mode; (c) mass detection by scan in negative mode. Chromatographic conditions :

Column : Zorbax Eclipse XDB-C8, 3.5 $\mu$ , 150 x 3.00 mm.  
Mobile phase : A = 0.25 mM ammonium formate in water; B = Acetonitrile  
Isocratic: 90% A  
Flow Rate: 0.5 mL/mn  
Column temp: 25°C  
(a) DAD: 230.16 nm, reference = 360. Ligand **9** exhibits very weak absorbance intensity.

Print of window 38: Current Chromatogram(s)  
Data File : E:\CHEMSTATION\B0302\DATA\SNAPSHOT.D  
Sample Name : bis tetrazole  
=====

|                                                                                       |                   |
|---------------------------------------------------------------------------------------|-------------------|
| Acq. Operator : FT                                                                    | Location : Vial 1 |
| Injection Date : 30 Mar 11 12:35 pm +0100                                             | Inj : 1           |
| Acq. Method : JK-DISTART.M                                                            |                   |
| Analysis Method : E:\CHEMSTATION\B0302\DATA\FT-PHD\FTTEST000044.D\DA.M (JK-DISTART.M) |                   |
| Last changed : 3/30/2011 12:34:58 PM by FT                                            |                   |

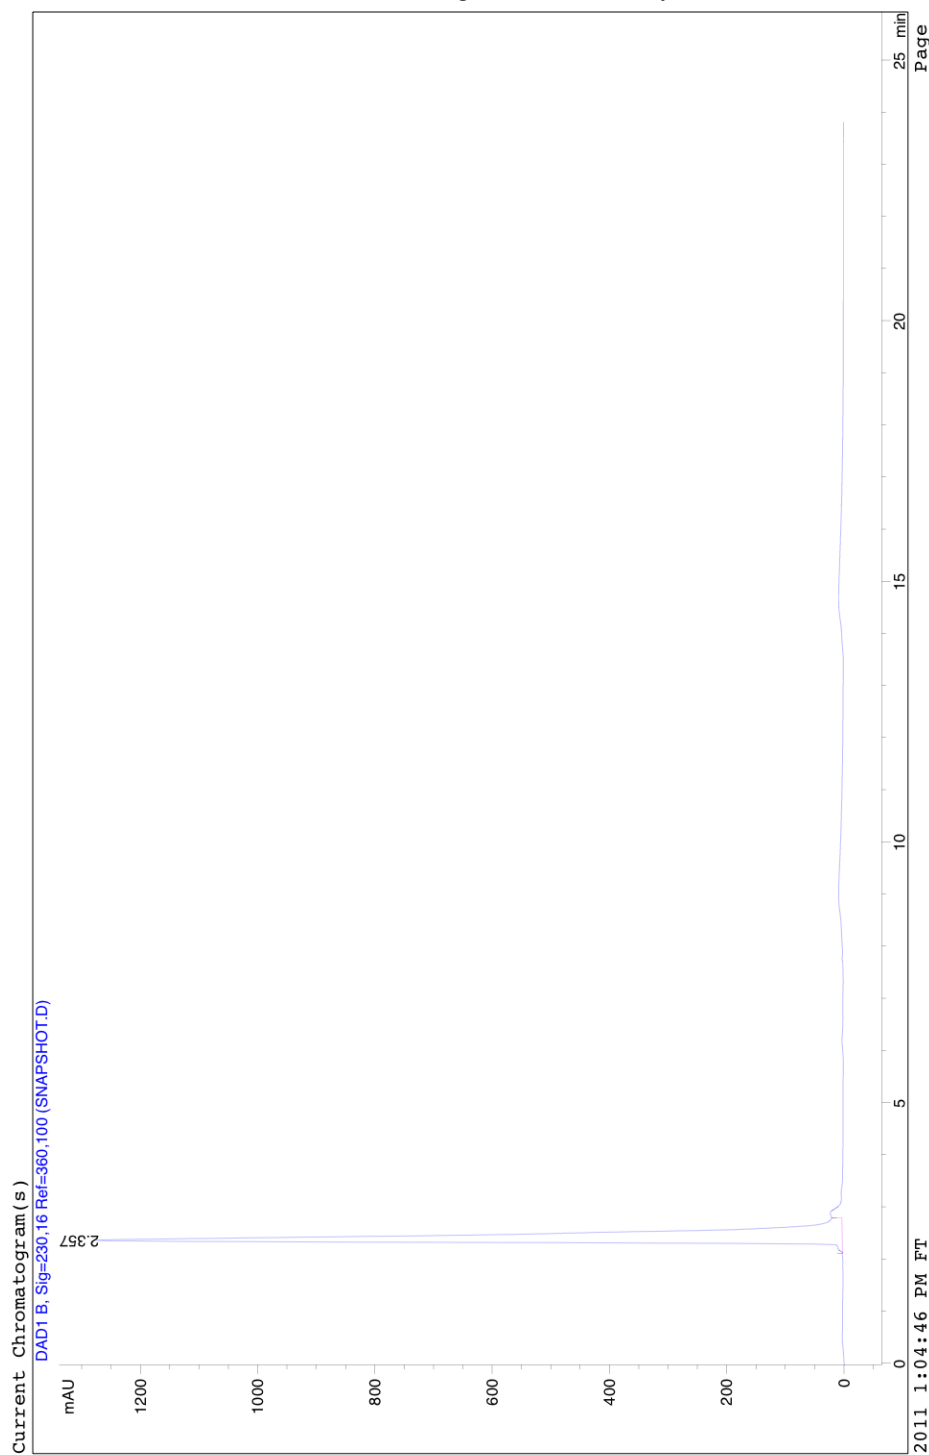

LCMS 3/30/2011 1:04:46 PM FT

25 min  
Page



(b) Mass analysis : API-ESI, scan mode / positive mode

Chemical formula:  $C_{10}H_{19}N_{11}$  (293,18) :  $M+1 = 294.2$  (observed);  $2M+1 : 587.3$  (observed)

Print of window 80: MS Spectrum  
Data File : E:\CHEMSTATIONB0302\DATA\SNAPSHOT.D  
Sample Name : bis tetrazole  
=====

|                                                                                      |                   |
|--------------------------------------------------------------------------------------|-------------------|
| Acq. Operator : FT                                                                   | Location : Vial 1 |
| Injection Date : 30 Mar 11 12:35 pm +0100                                            | Inj : 1           |
| Acq. Method : JK-DISTART.M                                                           |                   |
| Analysis Method : E:\CHEMSTATIONB0302\DATA\FT-PHD\FTTEST000044.D\DA.M (JK-DISTART.M) |                   |
| Last changed : 3/30/2011 1:11:15 PM by FT                                            |                   |
| (modified after loading)                                                             |                   |

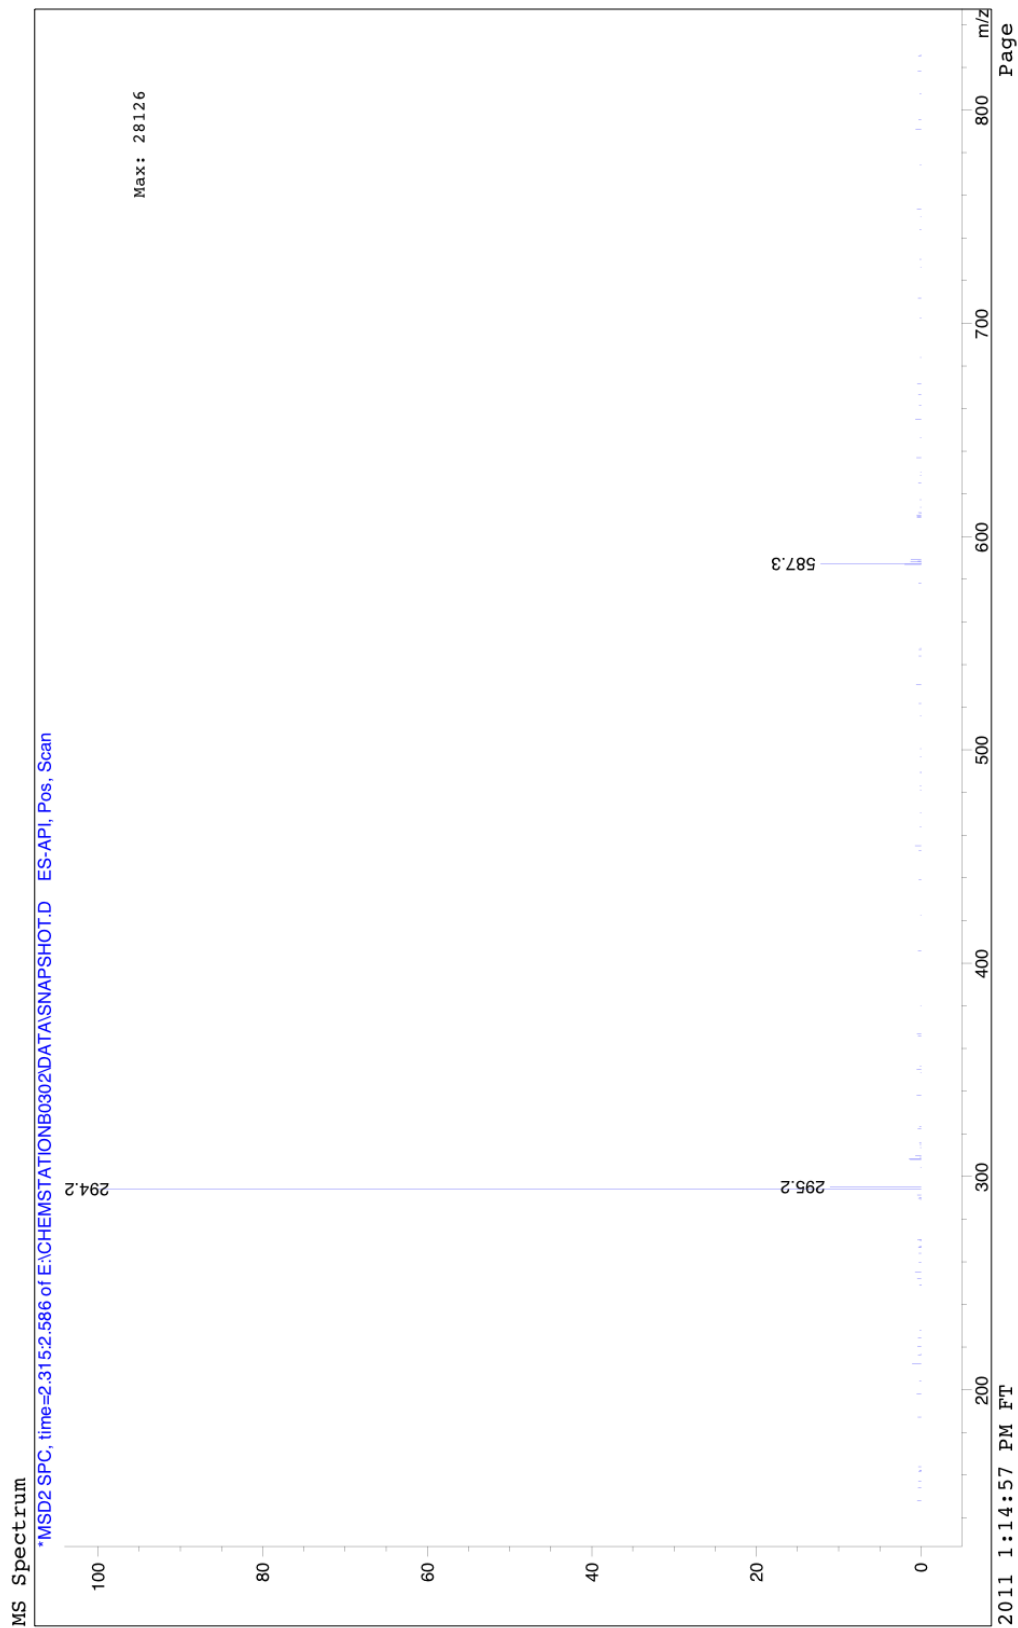

(c) Mass analysis : API-ESI, scan mode / negative mode

Chemical formula: C<sub>10</sub>H<sub>19</sub>N<sub>11</sub> (293,18) : M-1 = 292.3 (observed); 2M -1 : 585.3 (observed)

Print of window 80: MS Spectrum  
Data File : E:\CHEMSTATIONB0302\DATA\FT-PHD\FTTEST000045.D  
Sample Name : bis tetrazole  
=====

|                                        |                   |
|----------------------------------------|-------------------|
| Acq. Operator : FT                     | Location : Vial 1 |
| Acq. Instrument : LCMS                 | Inj : 1           |
| Injection Date : 3/30/2011 12:35:51 PM | Inj Volume : 2 µl |

=====

Acq. Method : E:\CHEMSTATIONB0302\METHODS\JK-DISTART.M  
Last changed : 3/30/2011 12:35:04 PM by FT  
(modified after loading)

Analysis Method : E:\CHEMSTATIONB0302\DATA\FT-PHD\FTTEST000045.D\DA.M (JK-DISTART.M)  
Last changed : 4/4/2011 12:57:29 PM by FT  
(modified after loading)

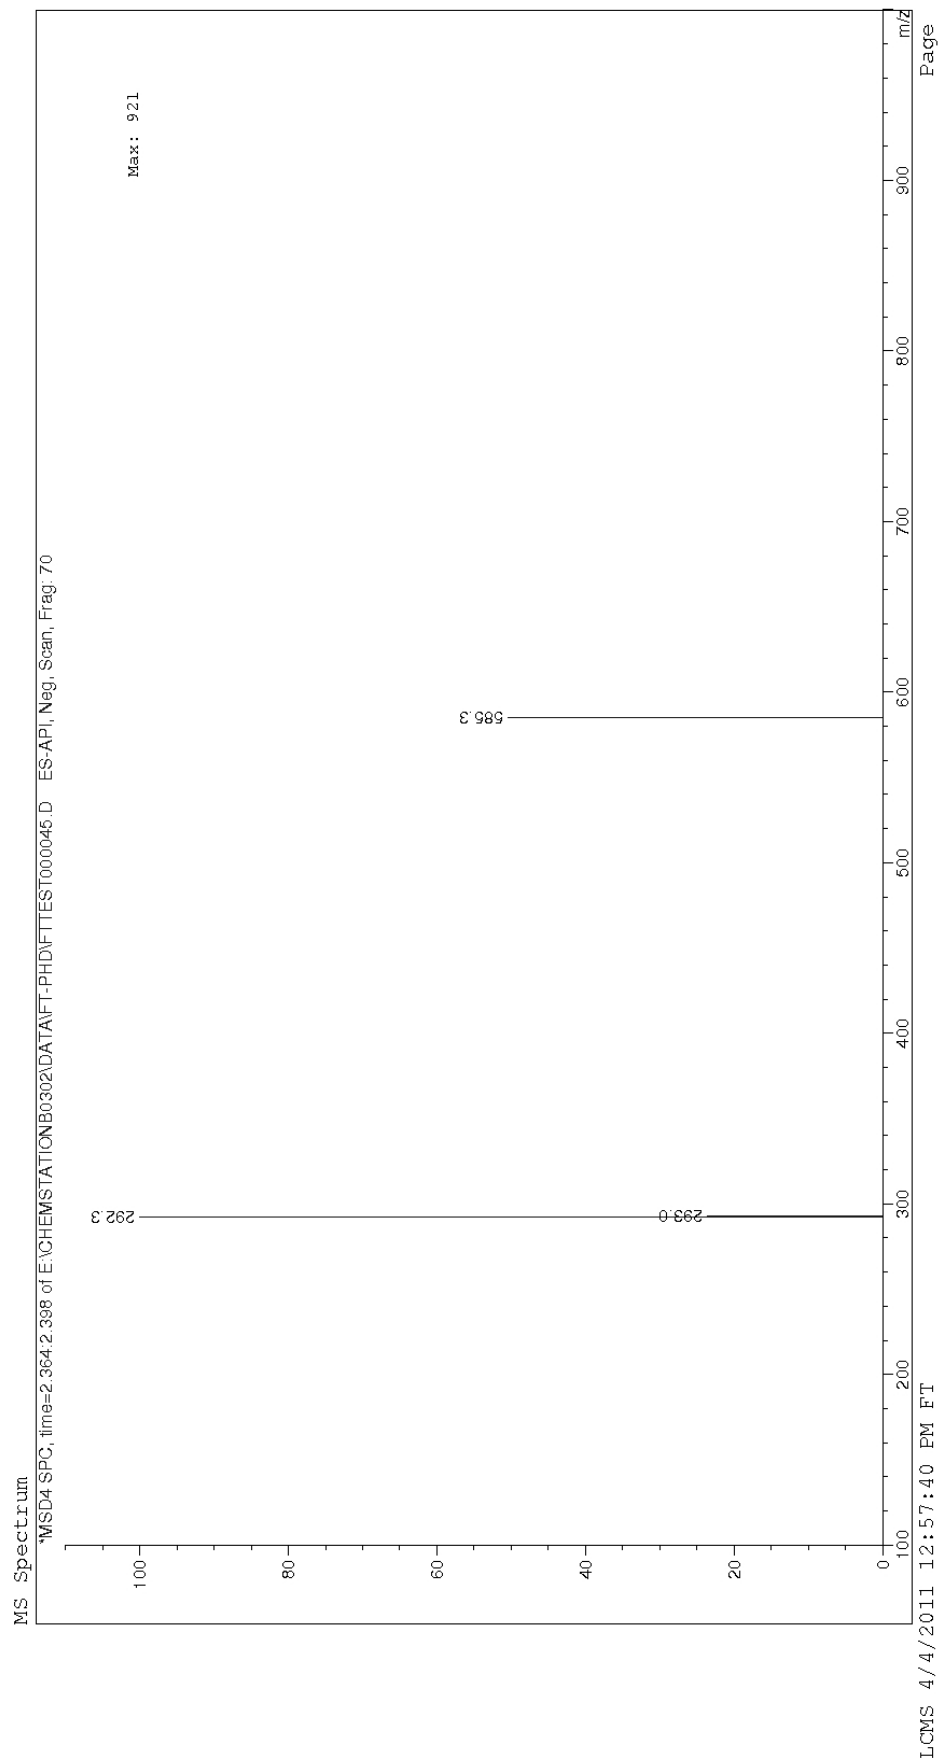

LCMS analyses of complex **1** : (a) DAD detection; (b) mass detection by Selected Ion Monitoring (SIM) in positive mode :  
 Column : Zorbax Eclipse XDB-C8, 3.5 $\mu$ , 150 x 3.00 mm.  
 Mobile phase : A = 0.25 mM ammonium formate in water; B = acetonitrile  
 Isocratic: 90% A  
 Flow Rate: 0.5 mL/min  
 Column temp: 25°C  
 (a) DAD: 230.16 nm, reference = 360. Complex **1** exhibits even weaker absorbance intensity compared to ligand **9**.

Print of window 38: Current Chromatogram(s)  
 Data File : E:\CHEMSTATION0302\DATA\FT-PHD\FTTEST000016.D  
 Sample Name : bis tet

=====

|                                                                                     |                        |
|-------------------------------------------------------------------------------------|------------------------|
| Acq. Operator : ft                                                                  | Location : Vial 1      |
| Acq. Instrument : LCMS                                                              | Inj : 1                |
| Injection Date : 3/30/2011 5:40:54 PM                                               | Inj Volume : 5 $\mu$ l |
| Acq. Method : E:\CHEMSTATION0302\METHODS\JK-DISTART.M                               |                        |
| Last changed : 3/30/2011 5:40:02 PM by ft                                           |                        |
| (modified after loading)                                                            |                        |
| Analysis Method : E:\CHEMSTATION0302\DATA\FT-PHD\FTTEST000016.D\DA.M (JK-DISTART.M) |                        |
| Last changed : 3/30/2011 5:59:48 PM by ft                                           |                        |

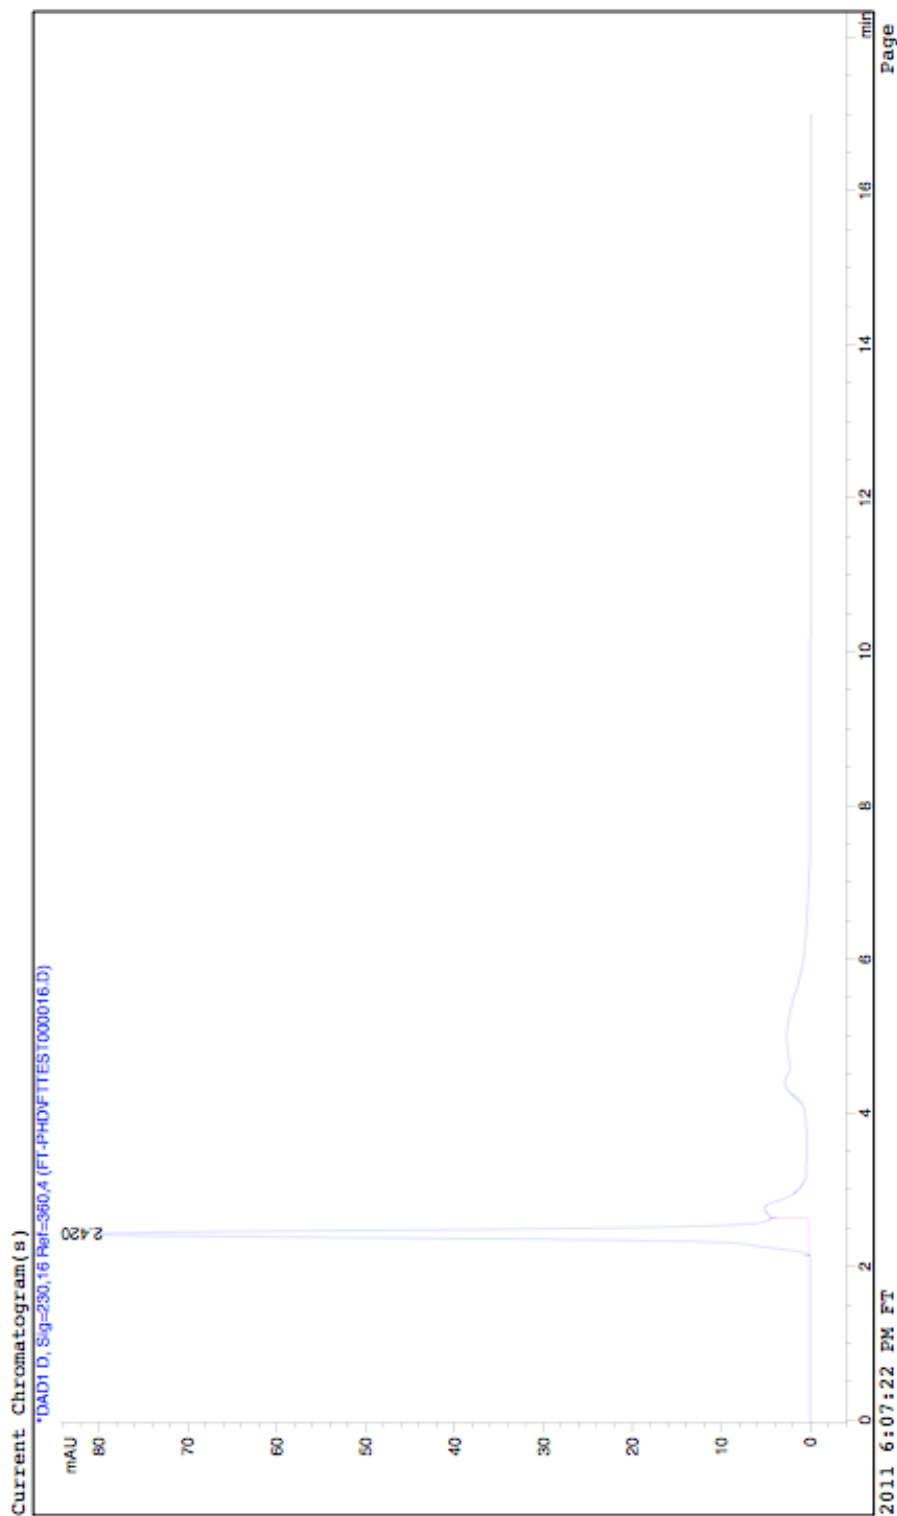

LCMS 3/30/2011 6:07:22 PM FT

(b) Mass analysis : API-ESI, SIM mode / positive mode  
Chemical formula:  $C_{10}H_{17}FeN_{11}$  (347,16) ;  $M+1 = 348.1$  (observed).

```

Print of window 80: MS Spectrum
Data File : E:\CHEMSTATIONB0302\DATA\FT-PHD\FTTEST000016.D
Sample Name : bis tet
=====
Acq. Operator   : ft
Acq. Instrument : LCMS
Injection Date  : 3/30/2011 5:40:54 PM
Location       : Vial 1
Inj            : 1
Inj Volume     : 5 µl
Method         : E:\CHEMSTATIONB0302\METHODS\JTK-DISTART.M
Last changed   : 3/30/2011 5:40:02 PM by ft
                (modified after loading)
Analysis Method : E:\CHEMSTATIONB0302\DATA\FT-PHD\FTTEST000016.D\DA.M
Last changed    : 3/30/2011 5:59:48 PM by ft

```

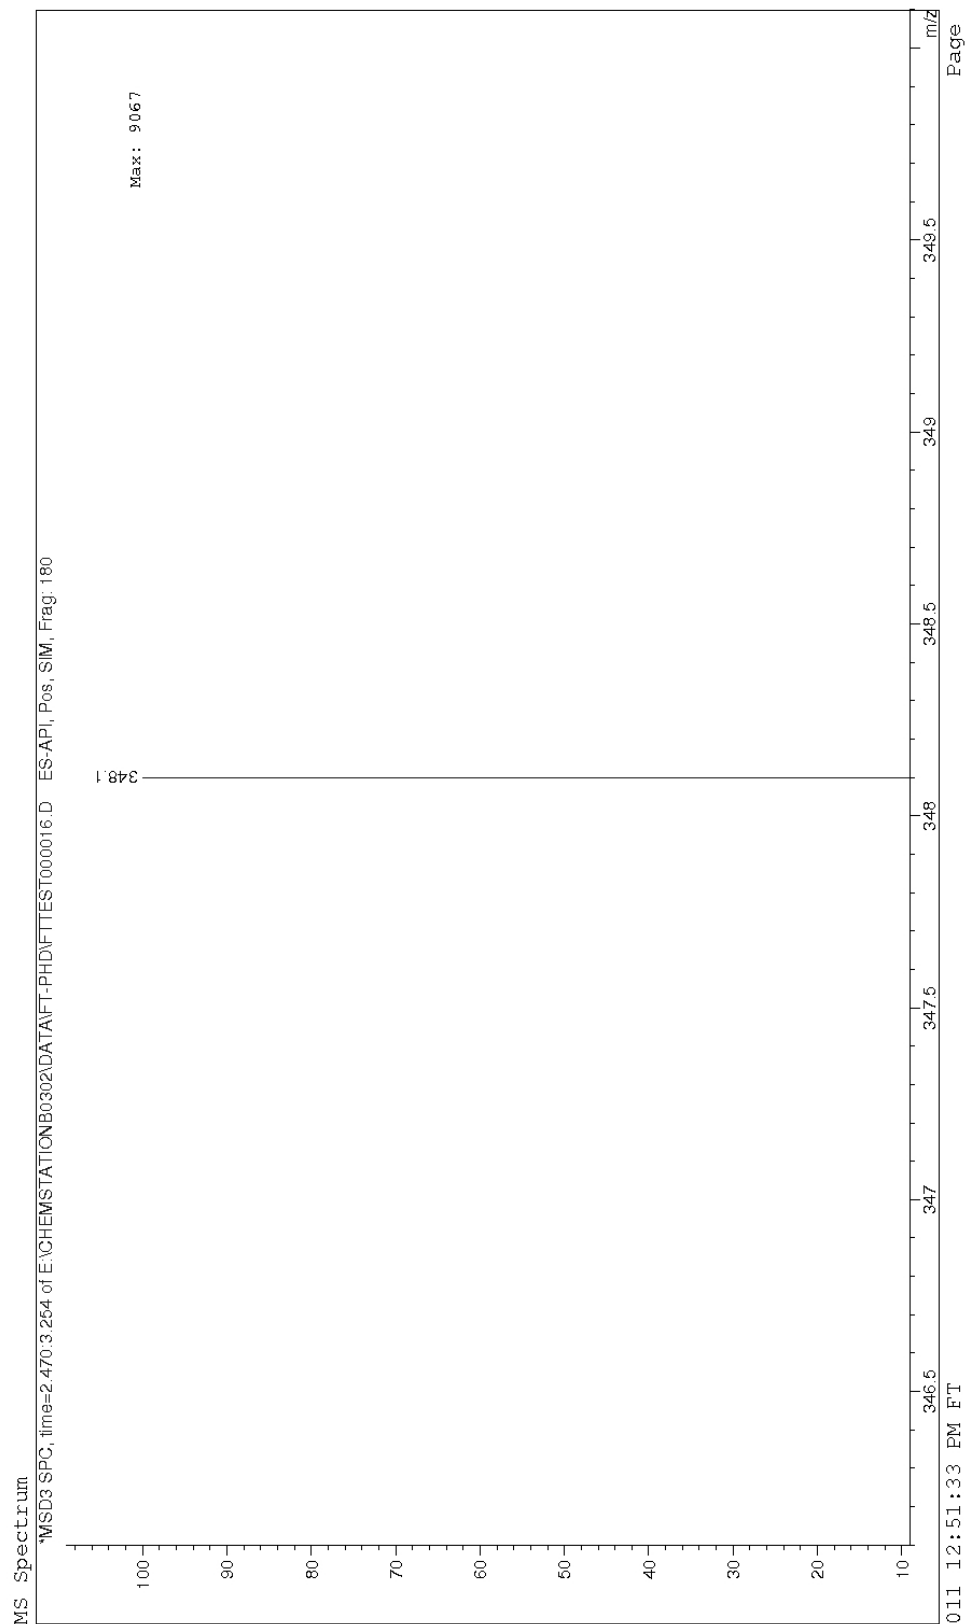

Infrared spectrum of complex **1** (KBr pellet)

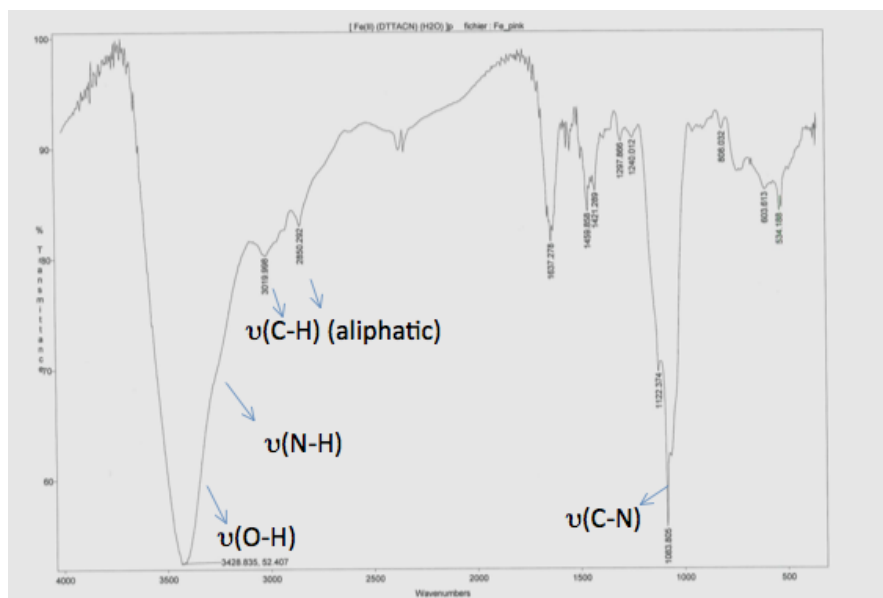

## **Injection/electroporation protocol**

Electroporation conditions : 200 V/cm, 8 pulses of 20 ms with 500 ms intervals.

All animal studies were performed in the Plateau de Biologie Expérimentale de la Souris (N° A 69 123 0303, PBES, ENS Lyon) under animal care procedures, conducted in accordance with the institutional guidelines set by the European Community Council Directives (86/609/EEC) and approved by the local ethical committee.

## **MRI**

MR images were performed on a 7T Biospec system (Bruker Biospin, Ettlingen, Germany) using a transmit/receive 32 mm inner diameter quadrature birdcage coil (Rapid Biomedical, Würzburg, Germany).

### **T<sub>1</sub> value quantification**

The longitudinal relaxation time T<sub>1</sub> was measured with an Inversion Recovery Fast Imaging with Steady state Precession (IR-FISP) sequence. Imaging parameters were: TR/TE = 4.2/2.1 ms, inversion times TI = (68 + i x 50) ms where i = 0, 1, ..., 32. Geometric parameters were: 40 x 40 mm<sup>2</sup> field of view (FOV), 3 mm slice thickness and 256 x 192 matrix size. T<sub>1</sub> values were obtained from multiple T<sub>1</sub> images by fitting a mono-exponential function to the data.

### **In vivo MRI**

Anesthesia was conducted with a dedicated gas anesthesia system (TEM, Bordeaux, France). Mice were first placed in an induction box with air mixed with 3 % of isoflurane gas (Nicholas Piramal limited, BLondon, UK) administrated at 0.8 L/min flow. The animals were then placed in a supine position on a plastic bed with the mouse nose placed in a face cone mask delivering the anesthetic gas (2 % isoflurane with air at 0.6 L/min flow). Circulating warm water located above the mouse was used to regulate the body temperature at 37 ± 1°C. The respiratory cycle was monitored using an air pillow connected to a Trigger Unit HSB-T (Rapid Biomedical, Würzburg, Germany).

T2-weighted turbo spin echo and a T<sub>1</sub>-weighted spin echo sequences were systematically performed at the same location both in coronal and transverse orientation. The T2-weighted images were acquired with TR/TE 3488/55 ms; a turbo factor of eight and a number of experiments (NEX) of 2. The T<sub>1</sub>-weighted images were acquired with TR/TE 500/12 ms and 4 NEX. For all these scans, FOV was 30 x 30 mm<sup>2</sup>, the slice thickness was 0.8 mm and the acquisition matrix size was 256 x 192. A zero-filling was performed at reconstruction to obtain a 512 x 512 matrix size.

Additionally, a three-dimensional (3D) Fast Low Angle Shot (FLASH) sequence was used with the following parameters: 45° flip angle, TR/TE 30/2.2 ms, 69 kHz receiver bandwidth (rbw) and 2 NEX. A 30 x 30 x 20 mm<sup>3</sup> FOV was acquired with a matrix size of 256 x 192 x 48. Acquisition volume was reconstructed to a 512 x 512 x 64 matrix.
